# Supplementary material
Source: Springer Nature journal article supplement (https://www.springermedizin.de/resource/supplementary/13014_2011_387_MOESM2_ESM.pdf/9633660)

Pre-RT CT

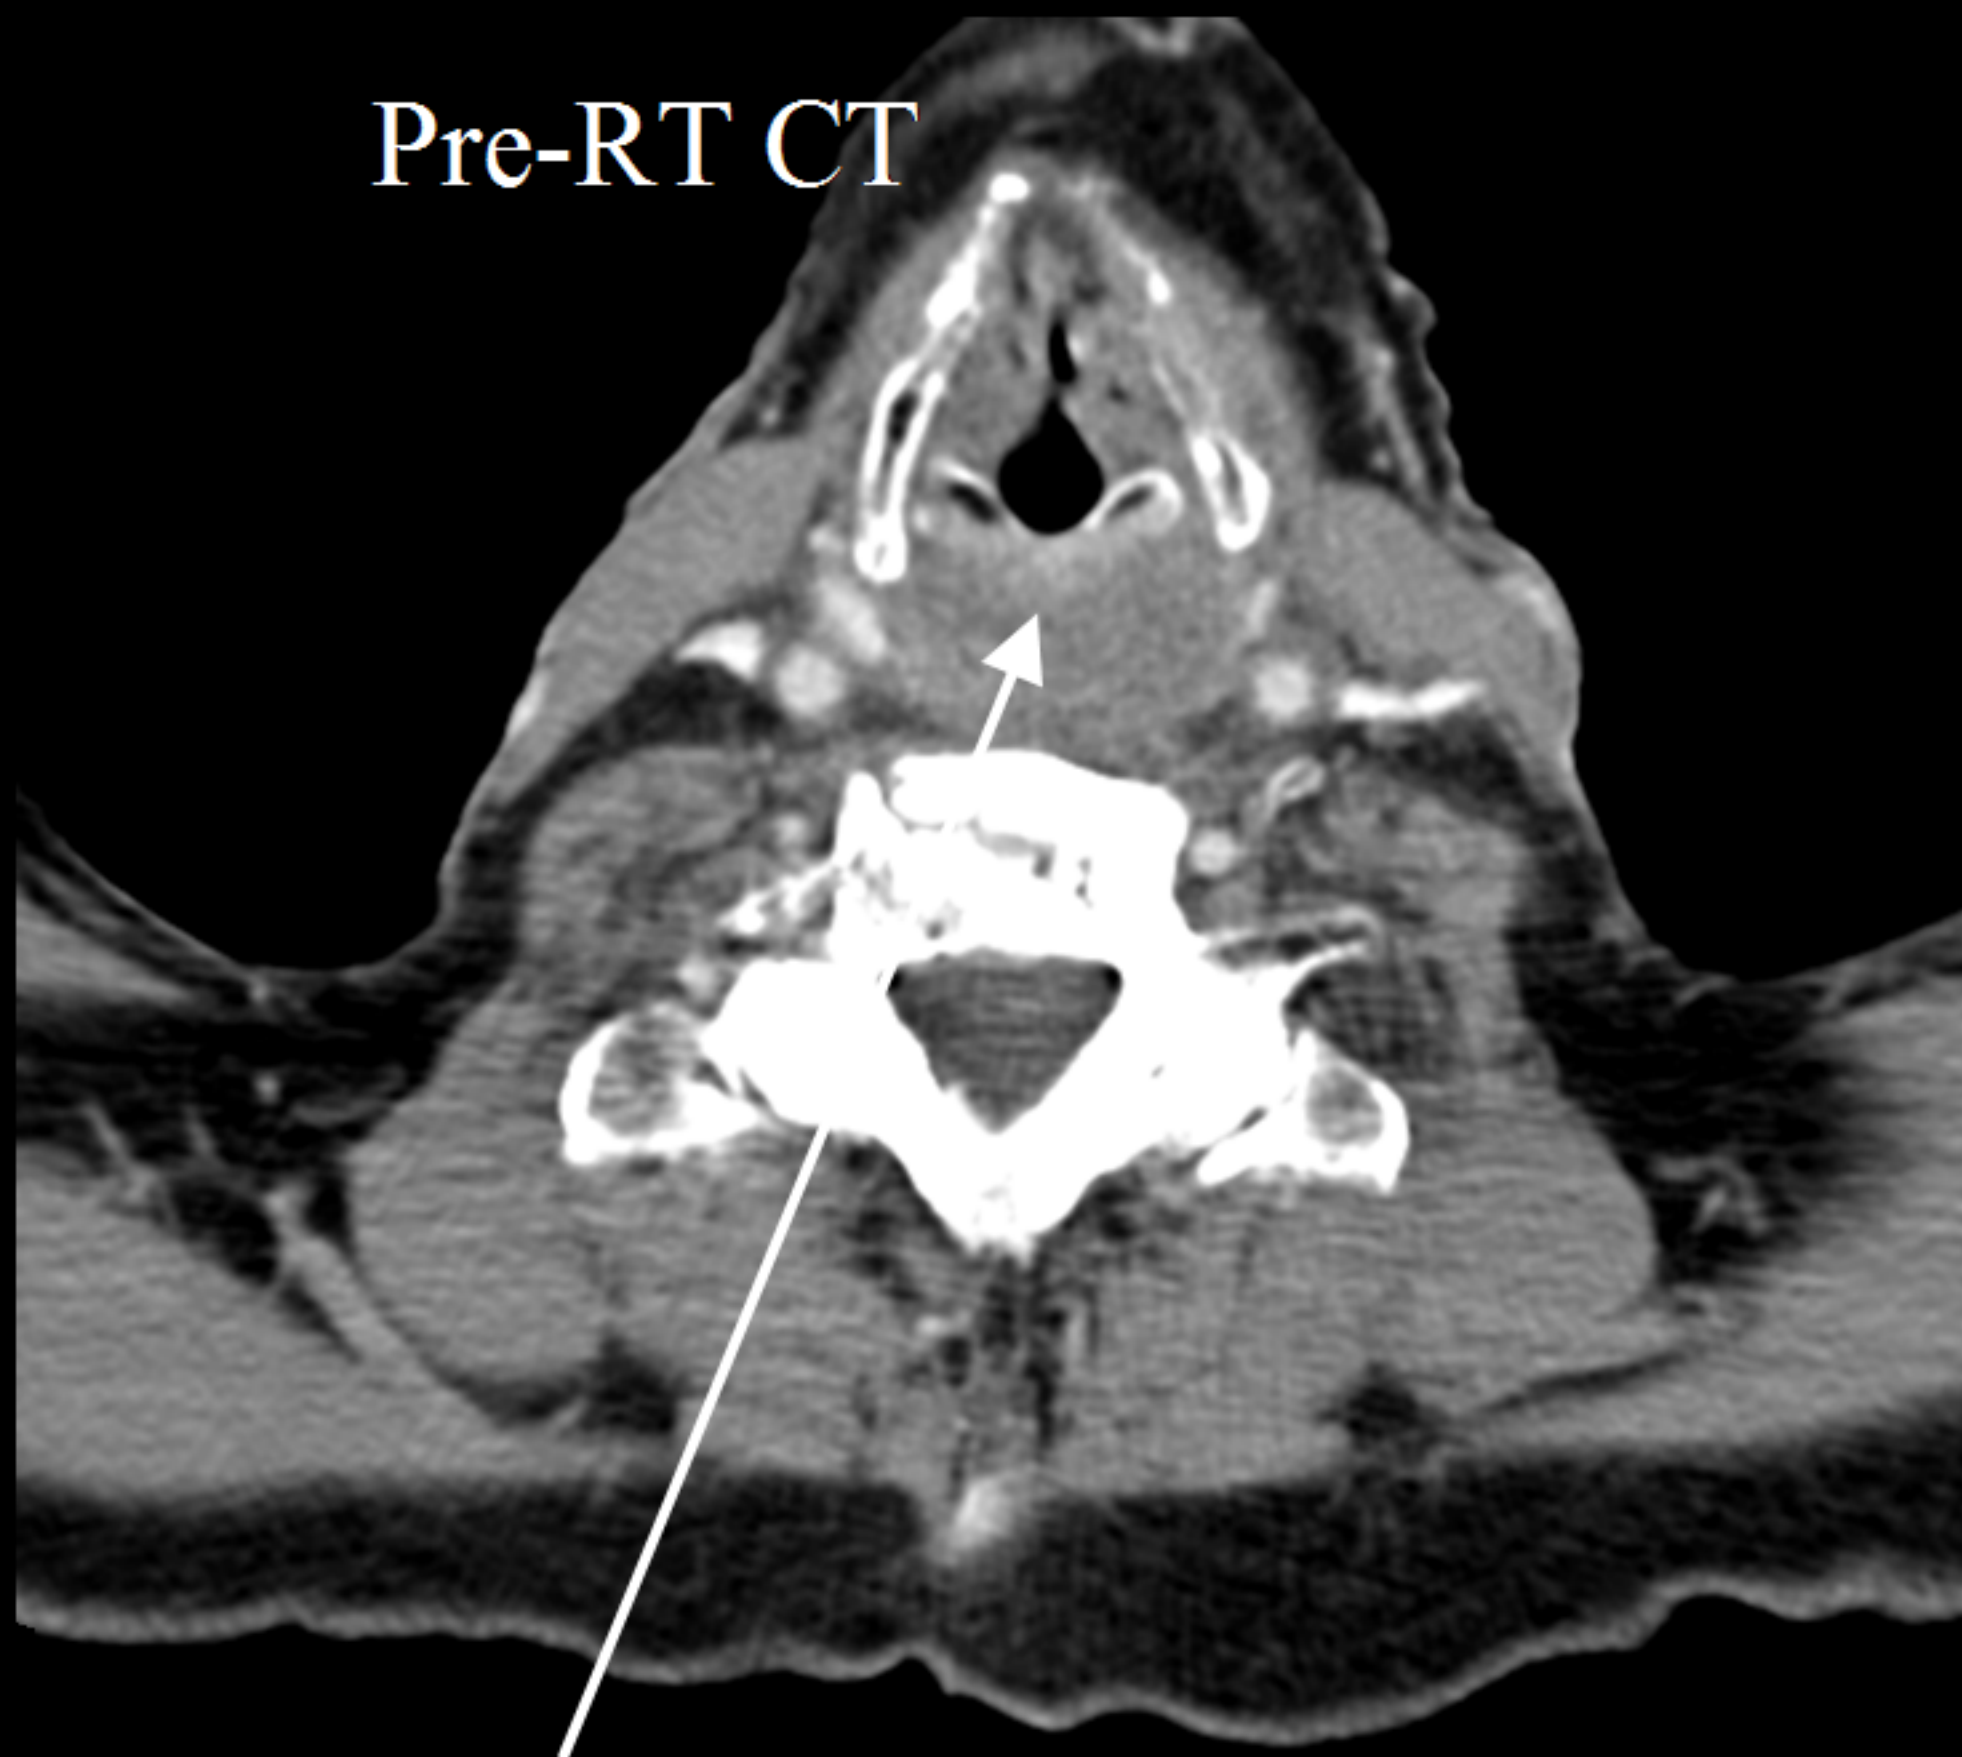

DVH-VOI Id 7 recur  
Volume (ccm): 25.  
Calc. pnts 199 / 199

DVH recurrent tumor

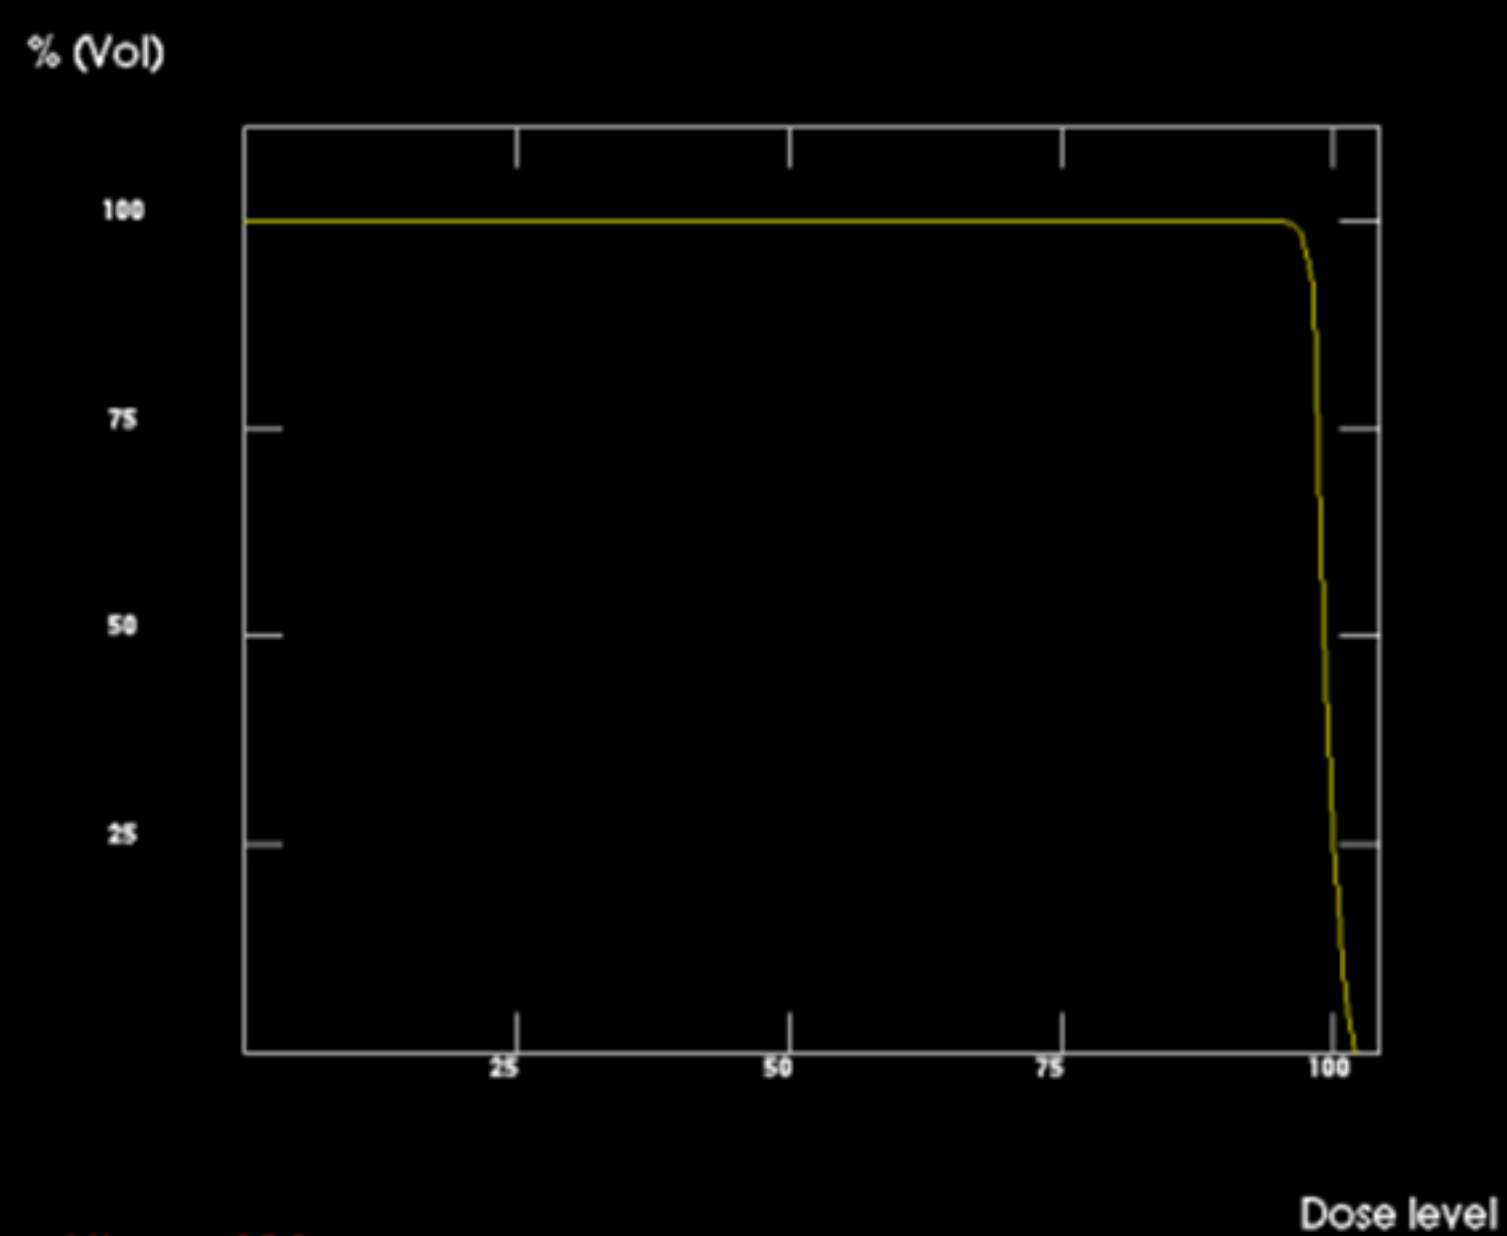

Min 95.9  
Max 101.9  
Median 99.1  
Mean 99.2

Post-RT CT

Recurrent tumor

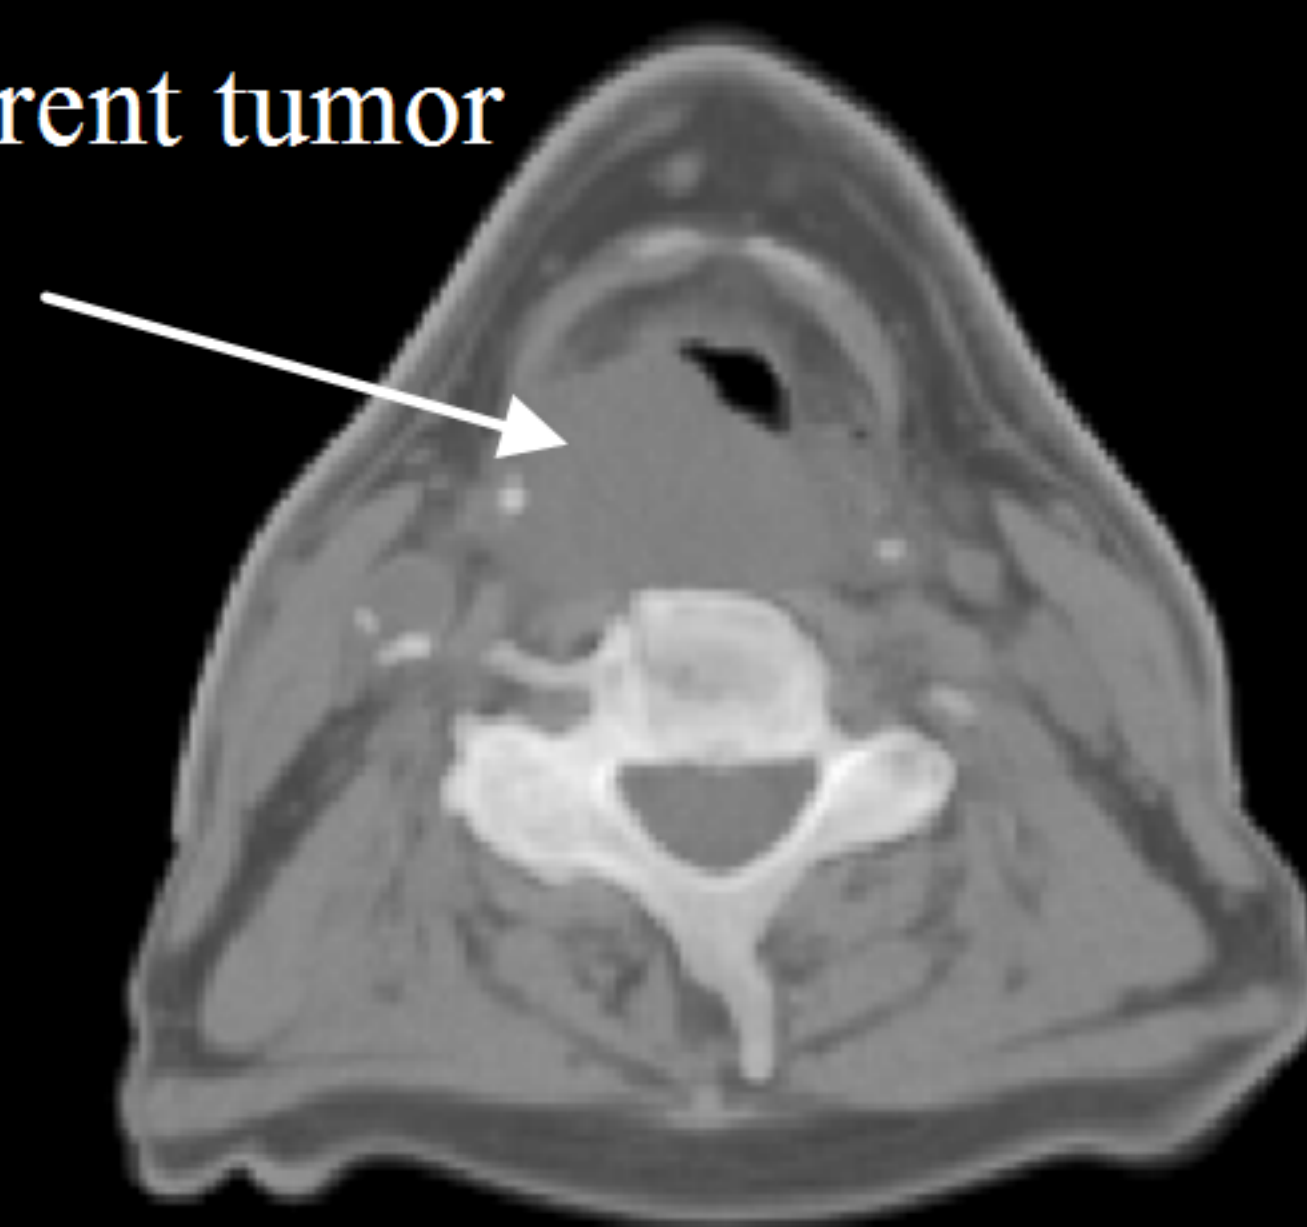

Tumor

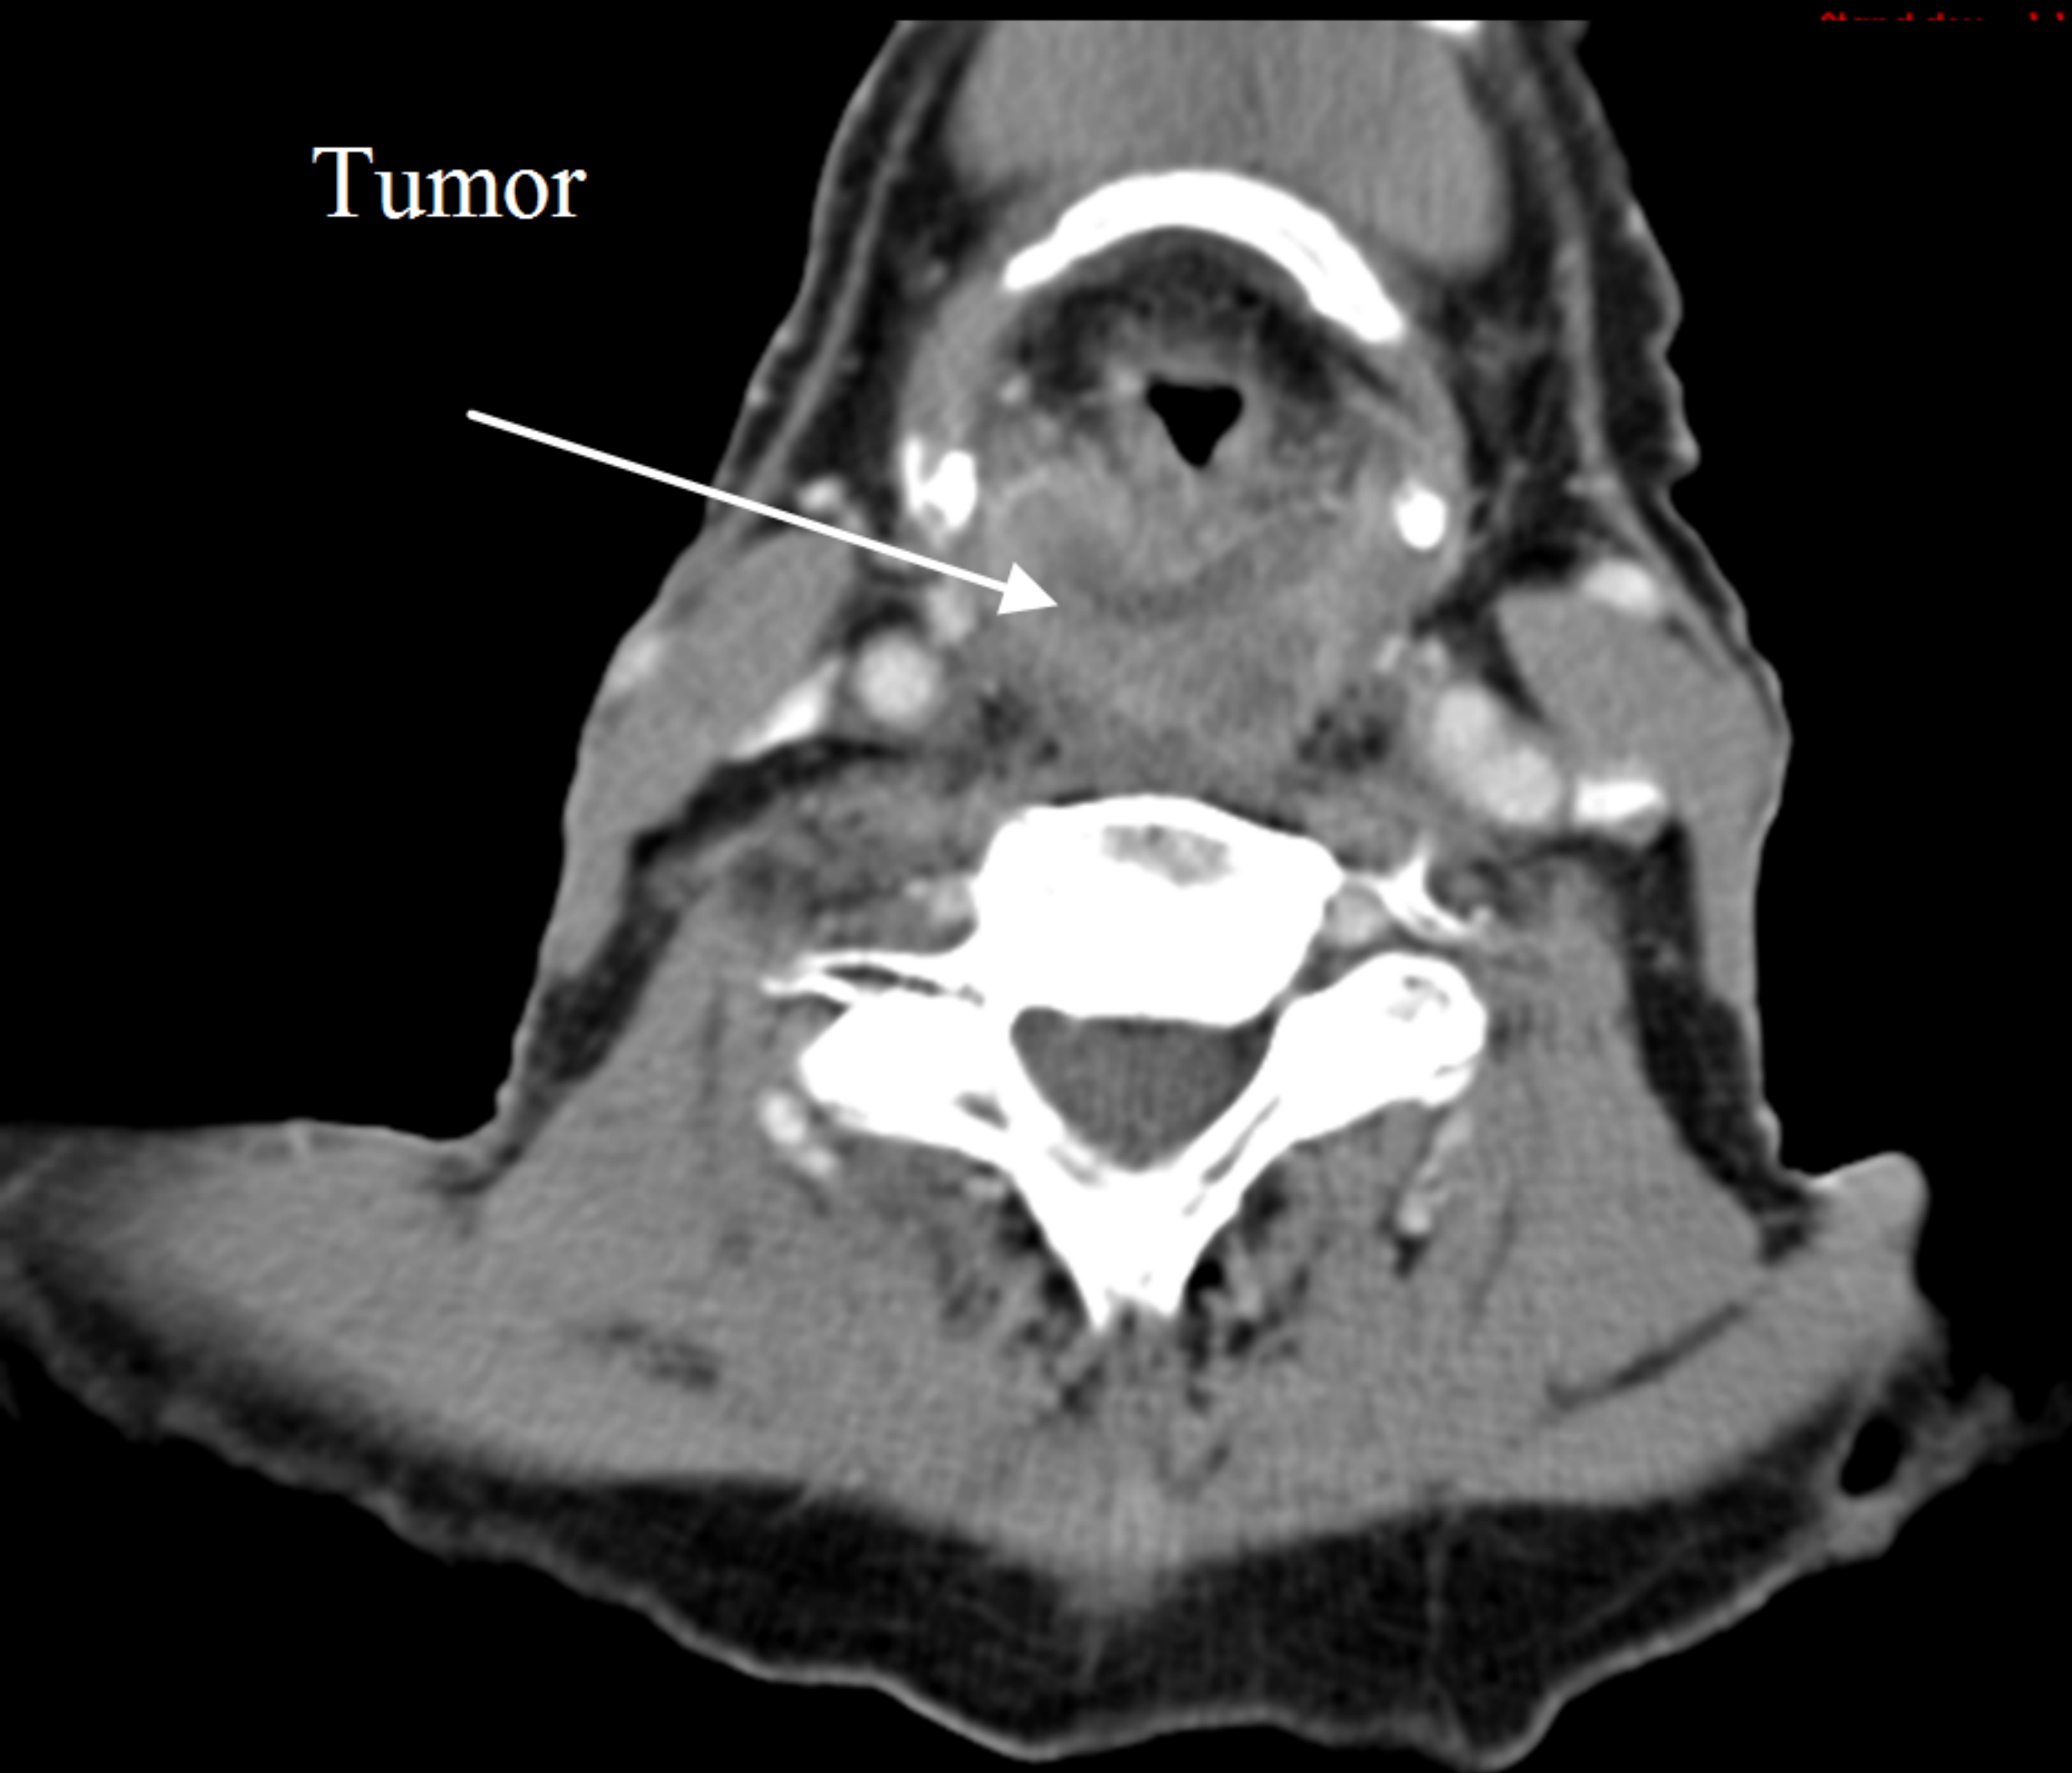

pre-RT CT

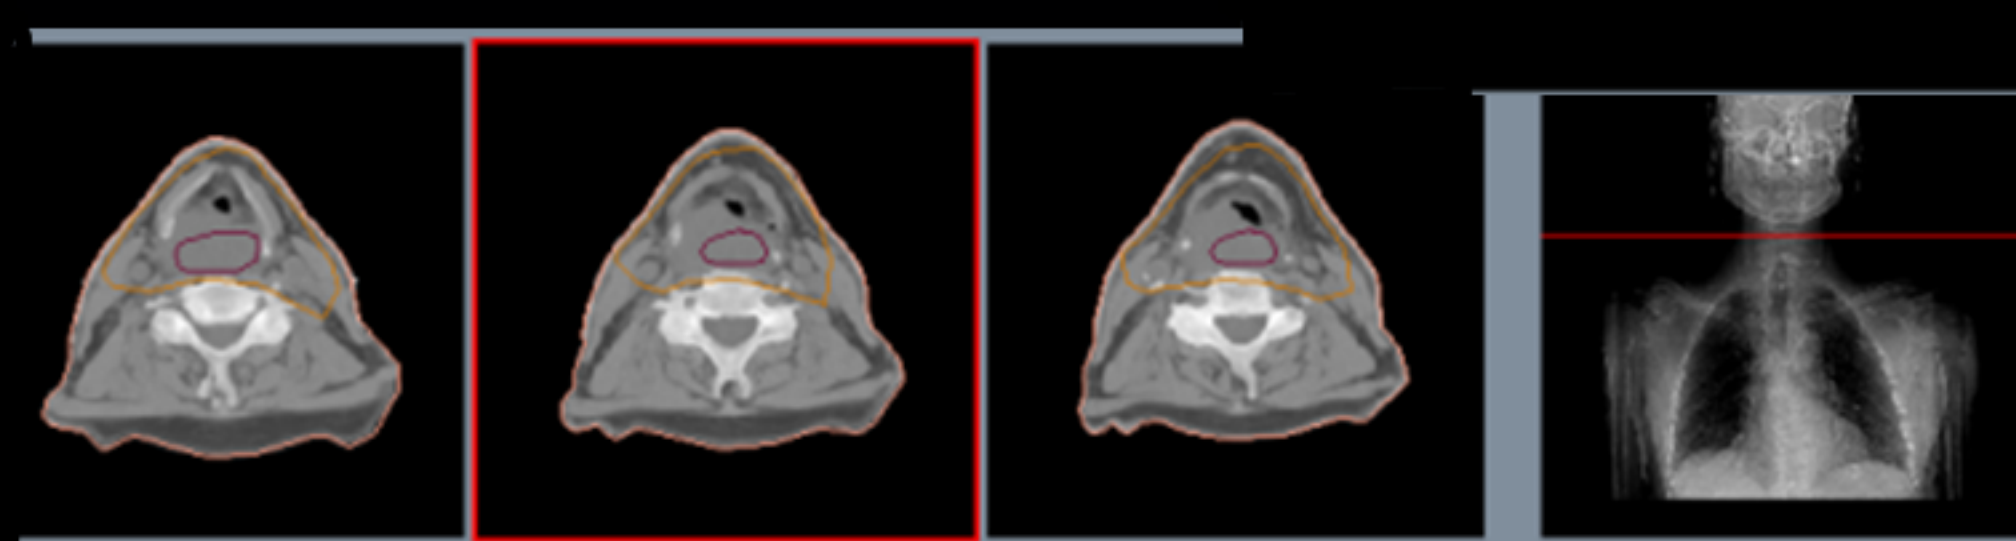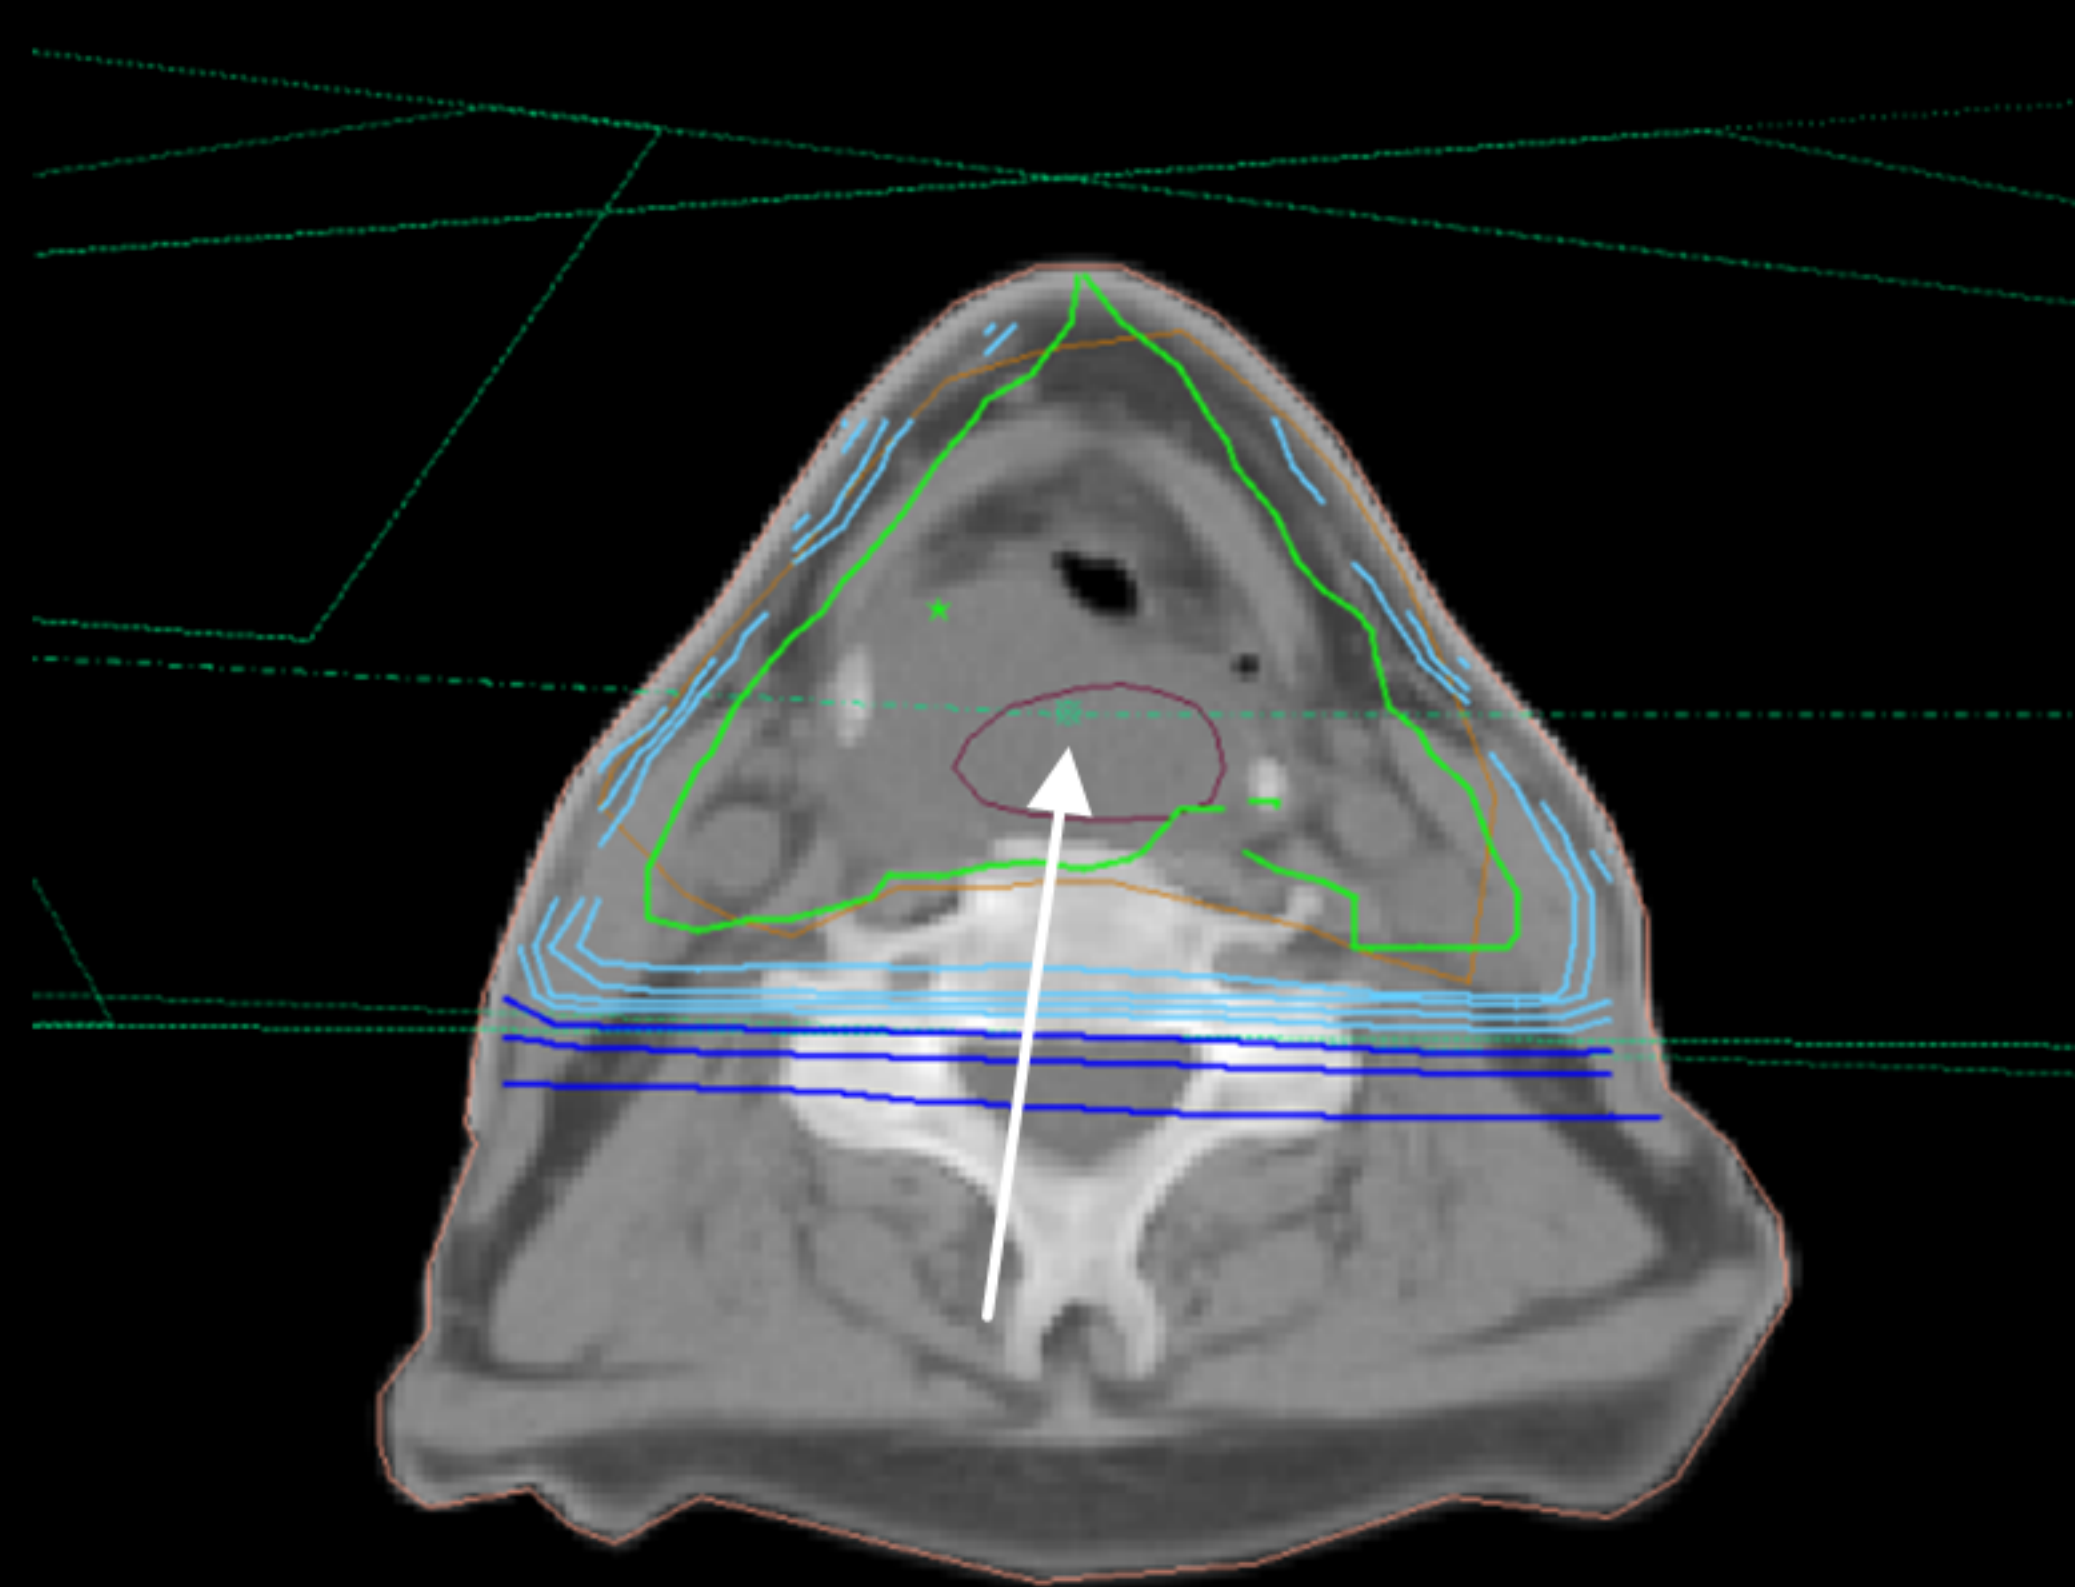

Recurrent tumor

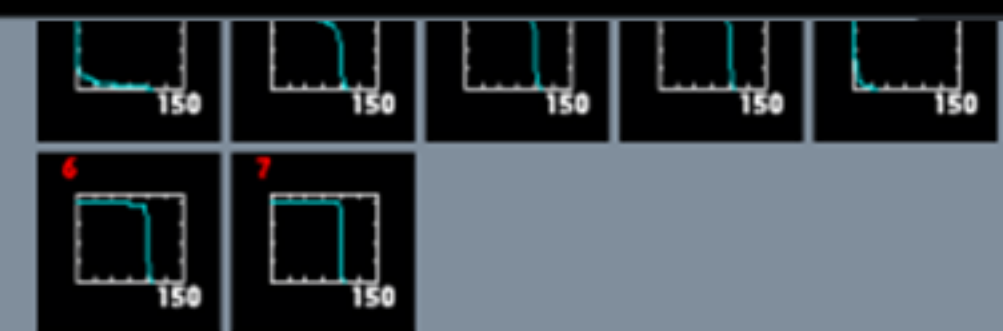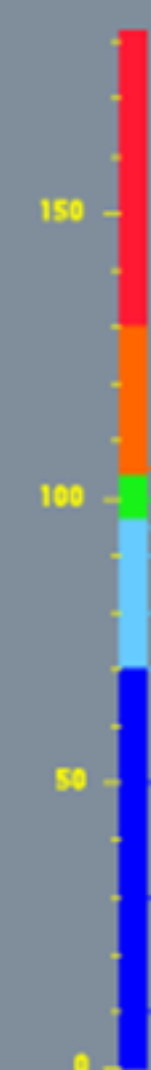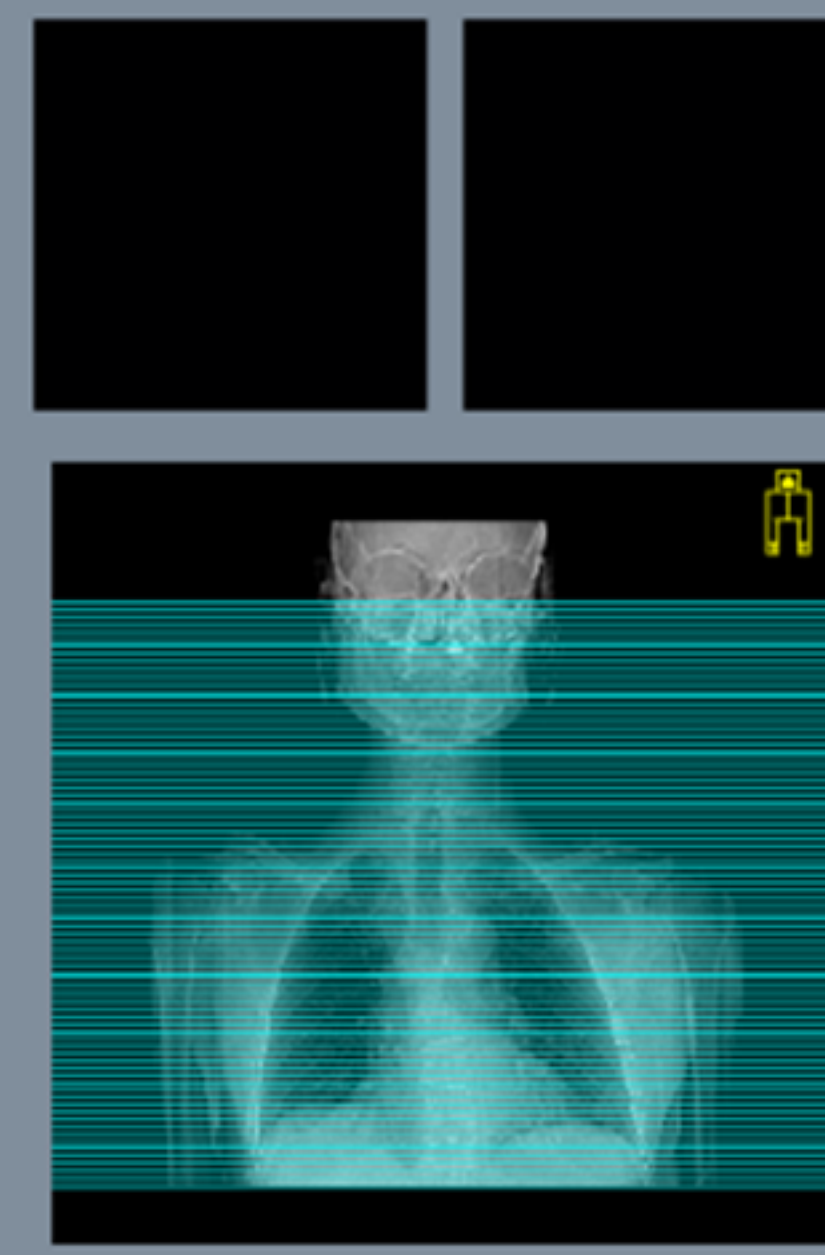

Supplement: MOESM2 [file 9633660]
